# Supplementary material for: Carbon dot hybrid porous carbon nanofibers as efficient electrocatalysts for the oxygen reduction reaction
Source: Royal Society of Chemistry journal article supplement (doi:10.1039/d3qm01064c), 2024-01-01
Supplement: d3qm01064c1.pdf [file d3qm01064c1.pdf]

## Supporting Information

### **Carbon Dots Hybrid Porous Carbon Nanofibers as Efficient Electrocatalysts for Oxygen Reduction Reaction**

Hongwu Yuan<sup>#,1</sup>, Penghuan Liu<sup>#,1</sup>, Jun Ren<sup>2</sup>, Zhan, Jiang<sup>1</sup>, Xiaohan Wang<sup>\*,1</sup>,  
Haiguang Zhao<sup>\*,1</sup>

<sup>1</sup> College of Textiles and Clothes, State Key Laboratory of Bio-Fibers and Eco-  
Textiles, Qingdao University, No. 308 Ningxia Road, Qingdao 266071, P.R. China

<sup>2</sup> School of Chemical Engineering and Technology, North University of China,  
Taiyuan 030051, P.R. China.

Email: [xh\\_wang@qdu.edu.cn](mailto:xh_wang@qdu.edu.cn); [hgzhao@qdu.edu.cn](mailto:hgzhao@qdu.edu.cn)

#These authors contributed equally to this work

## 1. Characterizations

The morphologies and structures of the various types of fabricated fibers were characterized using field emission scanning electron microscopy (FESEM; Zeiss, Sigma 300). TEM and HRTEM analyses were conducted using a JEOL JEM 2100Plus TEM operating at 200 kV to obtain transmission electron microscopy and high-resolution transmission electron microscopy images. X-ray photoelectron spectroscopy spectra were recorded utilizing a Thermo Scientific K-Alpha XPS spectrometer. Raman spectra were obtained using a LabRAM HR800 (HORLBA JY) instrument. Specific surface area and porosity data were acquired via nitrogen adsorption measurements (Kubo-x1000).

## 2. Figures and tables

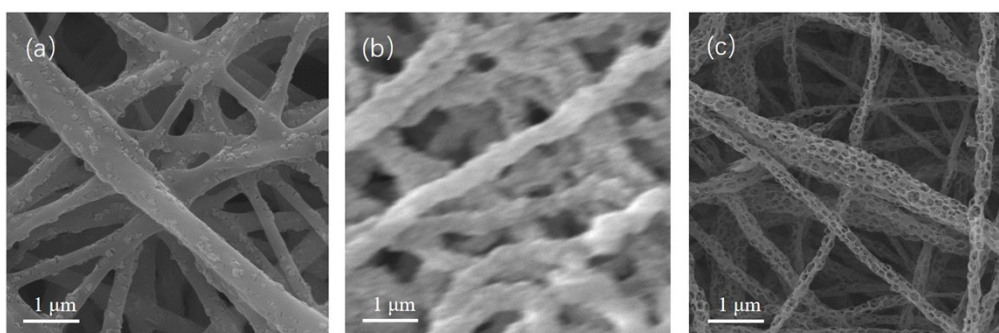

**Figure S1.** SEM images of (a) electrospun nanofibers, (b) oxidized nanofibers, and (c) mesoporous carbon nanofiber membranes

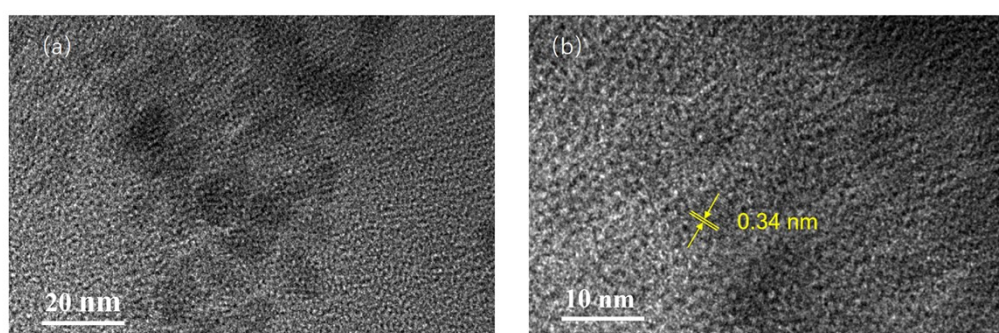

**Figure S2.** (a) TEM image of the C-dots. (b) The corresponding HRTEM image of the C-dots.

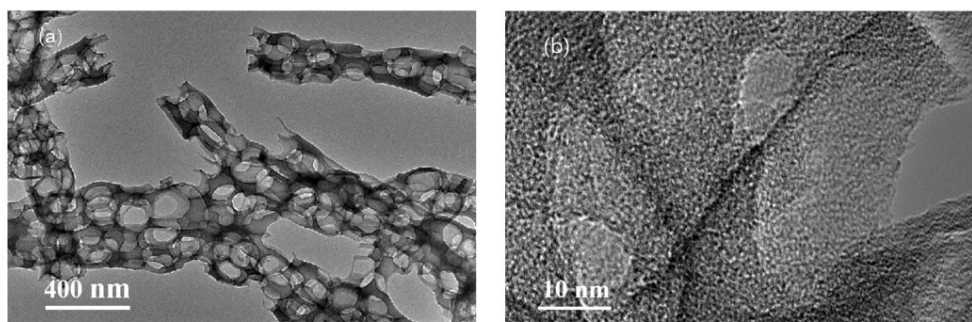

**Figure S3.** (a)TEM image of the PCNFs-900 without adding C-dots. (b)The corresponding HRTEM image of the PCNFs-900 without adding C-dots .

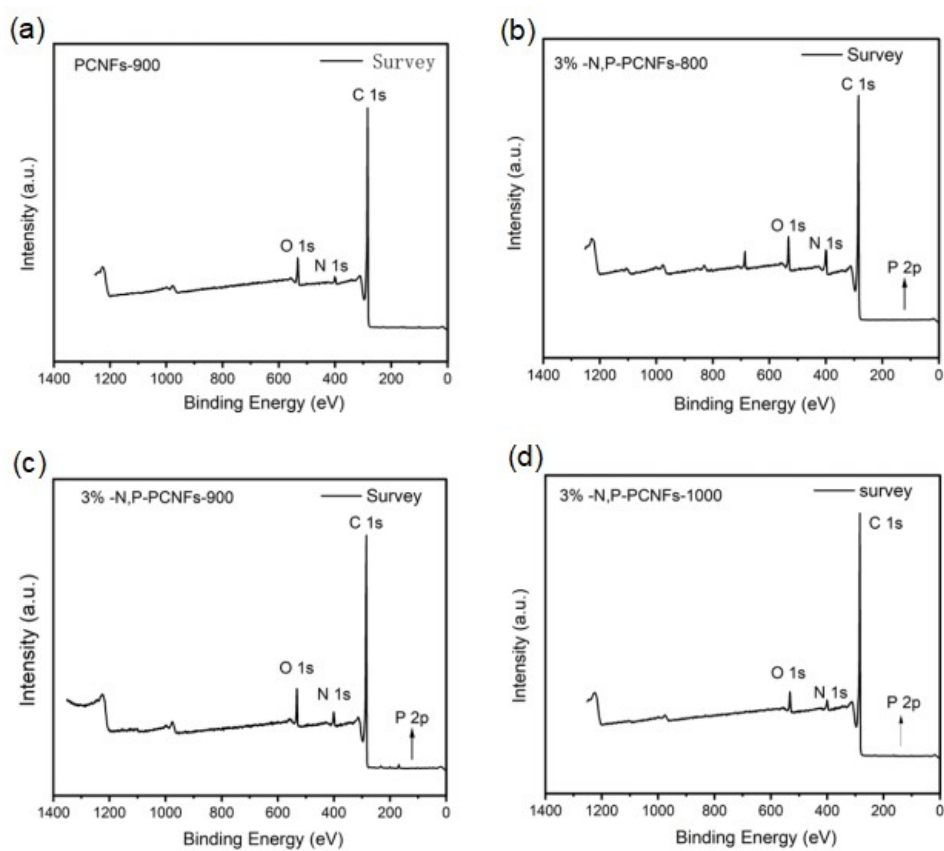

**Figure S4.** XPS survey spectra of the (a) PCNFs-900, (b) N,P-PCNFs-800, (c) N,P-PCNFs-900 and (d) N,P-PCNFs-1000.

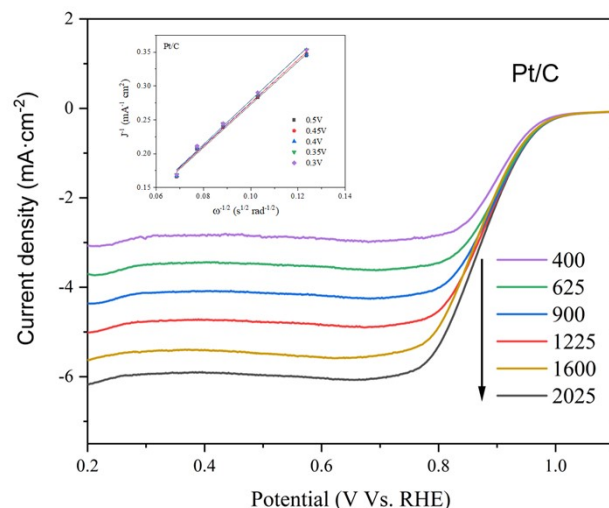

**Figure S5.** LSV curves of the Pt/C at different rotation speeds and the K–L plot at different potentials of Pt/C.

**Table S1** Relative contents of C, N, P, and O in the C-dots and N, P-PCNFs based on XPS measurements.

| Sample            | Relative contents (%) |     |      |     |
|-------------------|-----------------------|-----|------|-----|
|                   | C                     | N   | O    | P   |
| N, P doped C-dots | 54.3                  | 8.6 | 29.7 | 7.3 |
| 3%-N, P-PCNFs-900 | 89.6                  | 3.8 | 5.0  | 1.6 |
| PCNFs-900         | 92.3                  | 2.5 | 5.2  | 0   |

**Table S2** The atomic ratios of  $N_x/N_{total}$  in the N-P/CNFs [pyridinic nitrogen (N1), pyrrolic nitrogen (N2), graphitic nitrogen (N3), oxidized nitrogen (N0)].

| Sample             | Relative contents (%) |             |              |             |
|--------------------|-----------------------|-------------|--------------|-------------|
|                    | Pyridinic N1          | Pyrrolic N2 | Graphitic N3 | Oxidized N0 |
| 3%-N, P-PCNFs-800  | 38.1                  | 25.3        | 26.6         | 10.0        |
| 3%-N, P-PCNFs-900  | 26.5                  | 21.6        | 37.5         | 14.4        |
| 3%-N, P-PCNFs-1000 | 17.6                  | 19.6        | 43.4         | 19.3        |
| PCNFs-900          | 28.3                  | 15.9        | 35.2         | 20.6        |

**Table S3** The atomic ratios of P-C and P-O in the 3%-N, P-PCNFs-900.

| Sample            | Relative contents (%) |             |
|-------------------|-----------------------|-------------|
|                   | P-O (133.9)           | P-C (132.5) |
| 3%-N, P-PCNFs-900 | 44.2                  | 55.8        |

**Table S4.** The onset potential and half-wave potential of electrocatalysts measured in 0.1 M KOH.

| Sample             | $E_{\text{overpotential}}$ (V vs. RHE) |                                  |
|--------------------|----------------------------------------|----------------------------------|
|                    | $E_{\text{onset potential}}$           | $E_{\text{half-wave potential}}$ |
| PCNFs-900          | 0.77                                   | 0.67                             |
| 3%-N-PCNFs-900     | 0.81                                   | 0.68                             |
| 1%-N, P-PCNFs-900  | 0.83                                   | 0.71                             |
| 2%-N, P-PCNFs-900  | 0.84                                   | 0.70                             |
| 3%-N, P-PCNFs-800  | 0.81                                   | 0.69                             |
| 3%-N, P-PCNFs-900  | 0.88                                   | 0.72                             |
| 3%-N, P-PCNFs-1000 | 0.80                                   | 0.68                             |
| Pt/C (20 wt%)      | 0.92                                   | 0.76                             |

**Table S5.**

| Sample               | $E_{\text{overpotential}}$ (V vs. RHE) |                                  | Reference |
|----------------------|----------------------------------------|----------------------------------|-----------|
|                      | $E_{\text{onset potential}}$           | $E_{\text{half-wave potential}}$ |           |
| NPMC-1000            | 0.94                                   | 0.85                             | 1         |
| N, P-GDs/N-3DG       | 0.84                                   | 0.81                             | 2         |
| P-MC-4               | 0.86                                   | 0.80                             | 3         |
| NPCS-900             | 0.91                                   | 0.83                             | 4         |
| Fe@N-C-12            | 0.87                                   | 0.83                             | 5         |
| Co incorporated into | 0.85                                   | 0.78                             | 6         |

---

|                  |      |      |
|------------------|------|------|
| nitrogen-doped   |      |      |
| carbon nanotubes |      |      |
| 3%-N,P-PCNFs-900 | 0.88 | 0.72 |

---

### Supplementary References

1. J. T. Zhang, Z. H. Zhao, Z. H. Xia, L. M. Dai, A metal-free bifunctional electrocatalyst for oxygen reduction and oxygen evolution reactions, *Nature Nanotechnology*, 2015, 10, 444-452.
2. X. Tong, Mohamed Cherif, G. X. Zhang, X. X. Zhan, J. G. Ma, Ali Almesrati, Francois Vidal, Y. J. Song, Jerome P. Claverie, S. H. Sun, N, P-Codoped Graphene Dots Supported on N-Doped 3D Graphene as Metal-Free Catalysts for Oxygen Reduction, *ACS Applied Materials & Interfaces*, 2021, 13 (26): 30512-30523.
3. H. Zhao, Z. P. Hu, Y. P. Zhu, L. Ge, Z. Y. Yuan, P-doped mesoporous carbons for high-efficiency electrocatalytic oxygen reduction, *Chinese Journal of Catalysis*, 2019, 40, 1366-1374.
4. S. Chen, L. L. Zhao, J. Z. Ma, Y. Q. Wang, L. M. Dai, J. T. Zhang, Edge-Doping Modulation of N, P-Codoped Porous Carbon Spheres for High-Performance Rechargeable Zn-Air Batteries, *Nano Energy*, 2019, 60, 536-544.
5. Y. Ye, H. Li, F. Cai, et al., Two-Dimensional Mesoporous Carbon Doped with Fe-N Active Sites for Efficient Oxygen Reduction, *ACS Catal.*, 2017, 7, 7638-7646.
6. B. Peng, H. Zhang, H. Z. Shao, K. Xu, G. Ni, J. Li, H. Y. Zhua, Costas M. Soukouliscd, Chemical intuition for high thermoelectric performance in monolayer black phosphorus,  $\alpha$ -arsenene and aW-antimonene, *J. Mater. Chem. A: Mater. Energy Sustain.*, 2018, 6, 3386-3390.
